# Supplementary material
Source: PubMed Central journal article supplement (PMC3909939)

# Triflic acid-mediated rearrangements of 3-methoxy-8-oxabicyclo[3.2.1]octa-3,6-dien-2-ones: Synthesis of methoxytropolones and furans

Yvonne D. Williams,<sup>†,‡</sup> Christine Meck,<sup>†,‡</sup> Noushad Mohd,<sup>†</sup> and Ryan P. Murelli<sup>†,‡,\*</sup>

<sup>†</sup>Department of Chemistry, Brooklyn College, The City University of New York, 2900 Bedford Avenue, Brooklyn College 11210

<sup>‡</sup>Department of Chemistry, The Graduate Center, The City University of New York, 365 Fifth Avenue, New York, NY 10016

## Supporting Information

### Table of Contents

---

#### 3-methoxy-8-oxabicyclo[3.2.1]octa-3,6-dien-2-ones

|                                                                                                 |     |
|-------------------------------------------------------------------------------------------------|-----|
| 6-(4-bromophenyl)-3-methoxy-5-methyl-8-oxabicyclo[3.2.1]octa-3,6-dien-2-one ( <b>4f</b> ).....  | s-2 |
| 5-(chloromethyl)-3-methoxy-6-phenyl-8-oxabicyclo[3.2.1]octa-3,6-dien-2-one ( <b>4g</b> ).....   | s-3 |
| dimethyl 3-methoxy-4-oxo-8-oxabicyclo[3.2.1]octa-2,6-diene-6,7-dicarboxylate ( <b>4i</b> )..... | s-4 |

#### methoxytropolones

|                                                                                                   |      |
|---------------------------------------------------------------------------------------------------|------|
| 2-hydroxy-7-methoxy-5-methyl-4-phenylcyclohepta-2,4,6-trienone ( <b>6a</b> ).....                 | s-5  |
| 2-hydroxy-7-methoxy-5-methyl-4-(4-nitrophenyl)cyclohepta-2,4,6-trienone ( <b>6b</b> ).....        | s-6  |
| ethyl 6-hydroxy-4-methoxy-2-methyl-5-oxocyclohepta-1,3,6-trienecarboxylate ( <b>6c</b> ).....     | s-6  |
| 4-benzoyl-2-hydroxy-7-methoxy-5-methylcyclohepta-2,4,6-trienone ( <b>6d</b> ).....                | s-7  |
| ethyl 6-hydroxy-4-methoxy-2,7-dimethyl-5-oxocyclohepta-1,3,6-trienecarboxylate ( <b>6e</b> )..... | s-7  |
| 4-(4-bromophenyl)-2-hydroxy-7-methoxy-5-methylcyclohepta-2,4,6-trienone ( <b>6f</b> ).....        | s-8  |
| <i>HMBC and HSQC Spectra and Assignment</i> .....                                                 | s-9  |
| 4-(chloromethyl)-7-hydroxy-2-methoxy-5-phenylcyclohepta-2,4,6-trienone ( <b>6g</b> ).....         | s-10 |

#### modifications of halogenated methoxytropolones

|                                                                                                                                 |      |
|---------------------------------------------------------------------------------------------------------------------------------|------|
| 4-([1,1'-biphenyl]-4-yl)-2-hydroxy-7-methoxy-5-methylcyclohepta-2,4,6-trienone ( <b>7</b> ).....                                | s-11 |
| 4-([1,1'-biphenyl]-4-yl)-2,7-dihydroxy-5-methylcyclohepta-2,4,6-trien-1-one ( <b>8</b> ).....                                   | s-11 |
| (4-hydroxy-6-methoxy-5-oxo-2-phenylcyclohepta-1,3,6-trien-1-yl)methyl acetate ( <b>9</b> ).....                                 | s-12 |
| 4-(azidomethyl)-7-hydroxy-2-methoxy-5-phenylcyclohepta-2,4,6-trien-1-one ( <b>10</b> ).....                                     | s-13 |
| 2-hydroxy-7-methoxy-4-phenyl-5-((4-phenyl-1 <i>H</i> -1,2,3-triazol-1-yl)methyl)cyclohepta-2,4,6-trien-1-one ( <b>11</b> )..... | s-14 |

#### furans

|                                                              |      |
|--------------------------------------------------------------|------|
| dimethyl 2-methylfuran-3,4-dicarboxylate ( <b>12h</b> )..... | s-15 |
| dimethyl furan-3,4-dicarboxylate ( <b>12i</b> ).....         | s-15 |

---

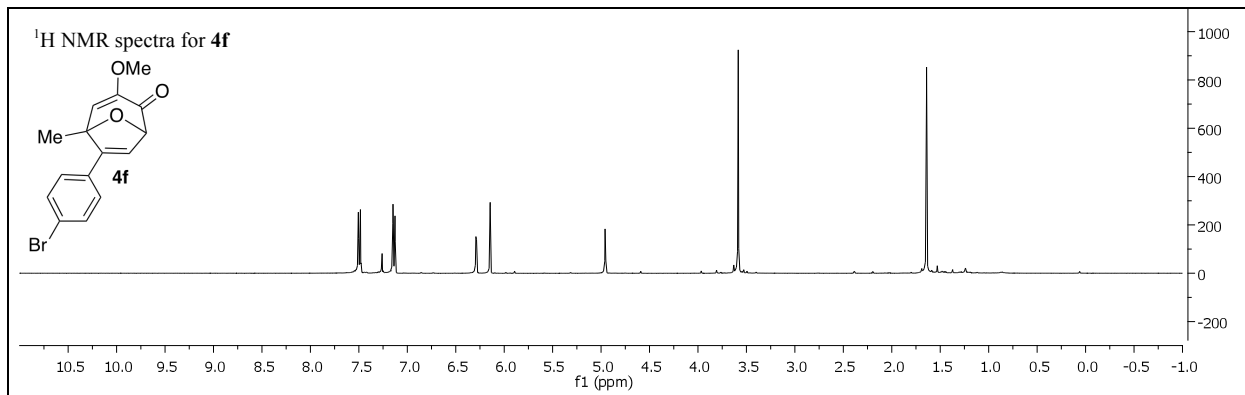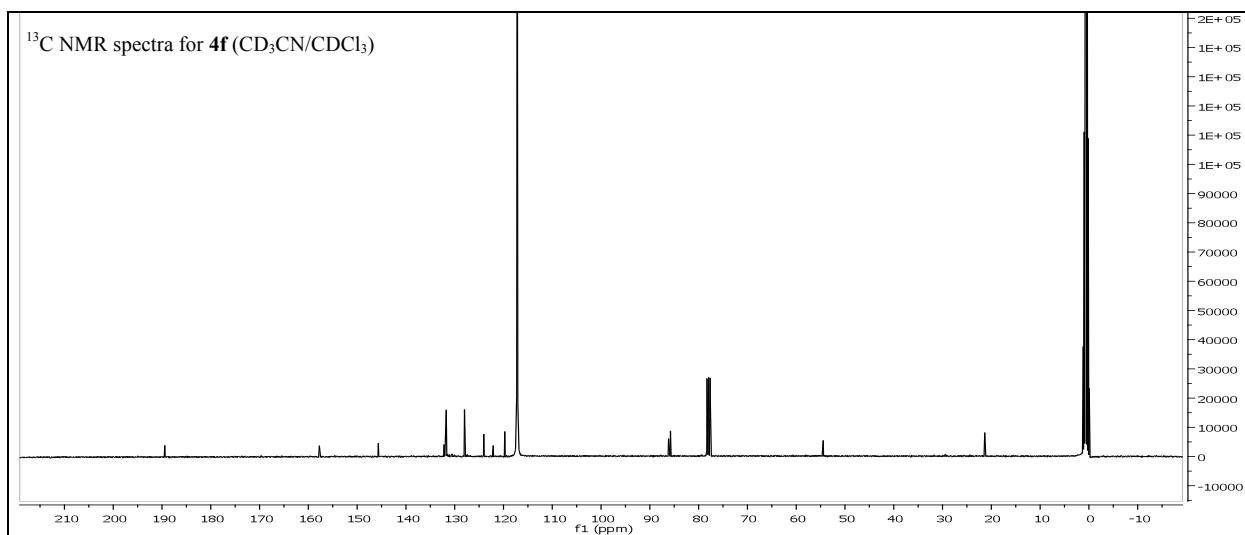

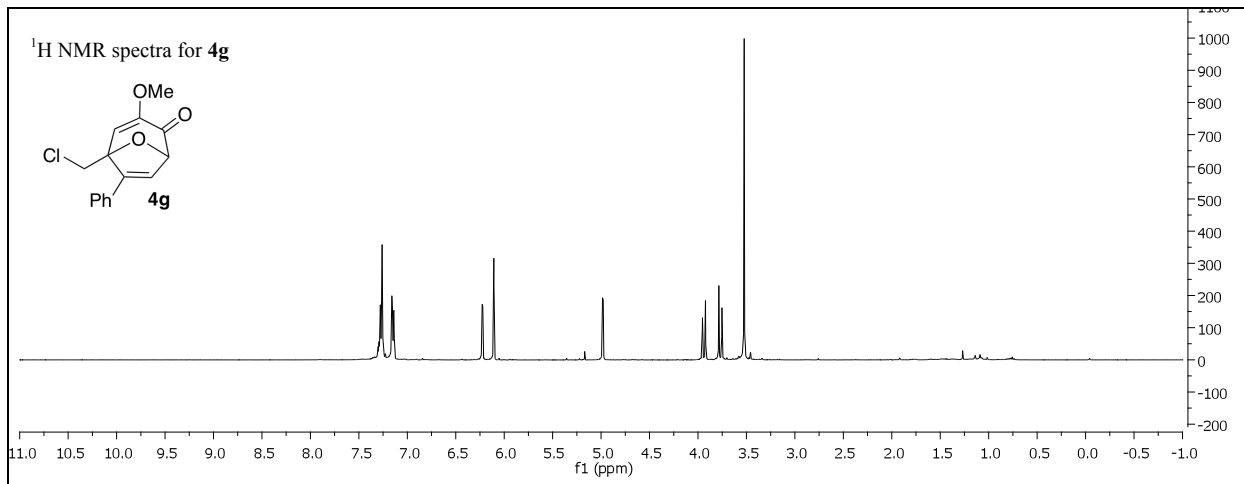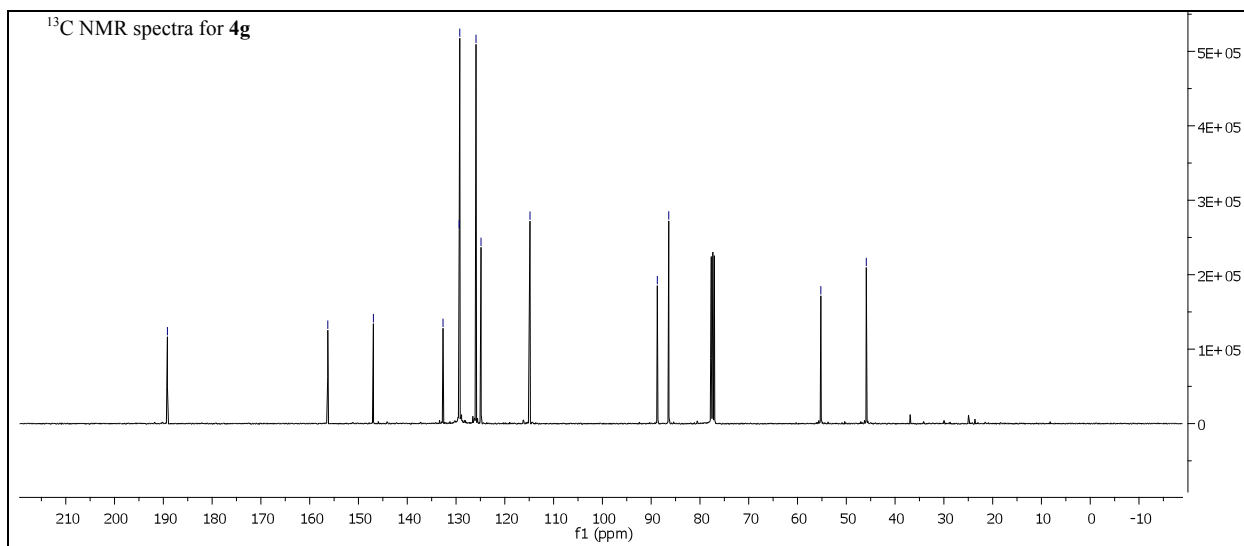

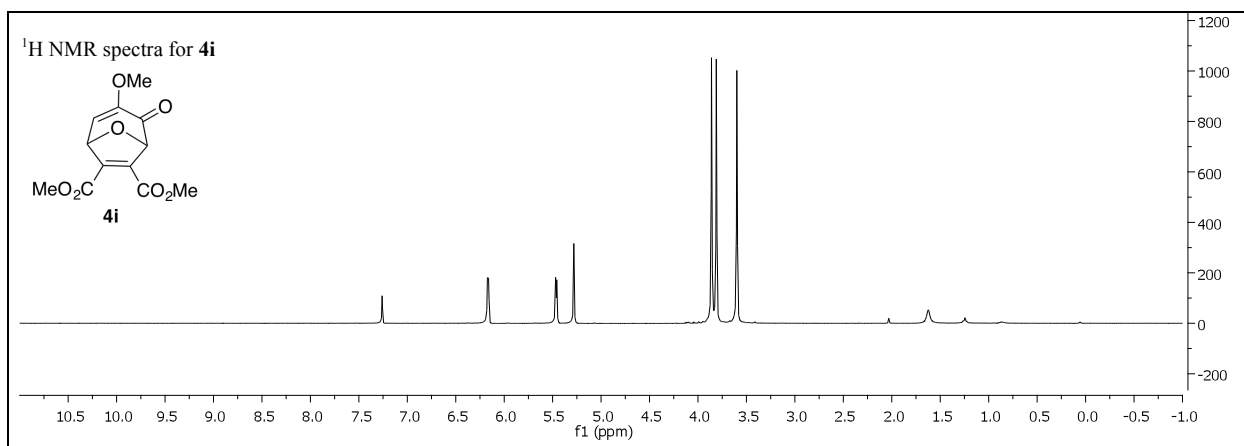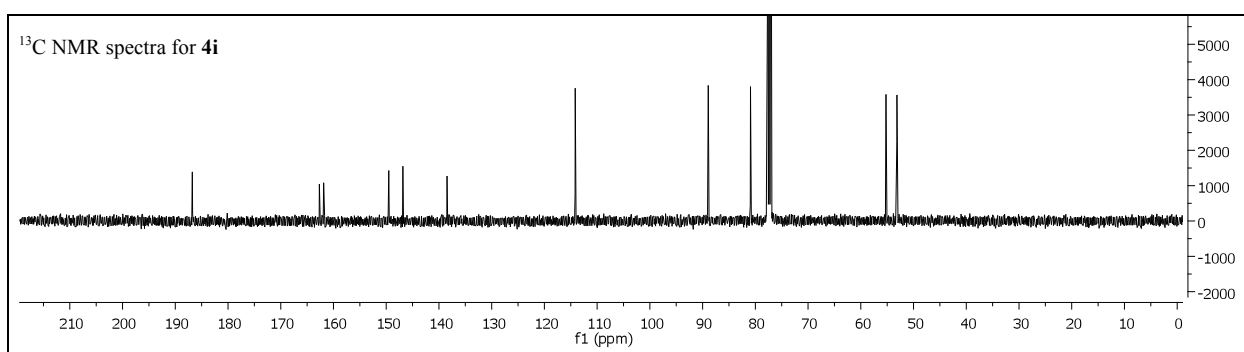

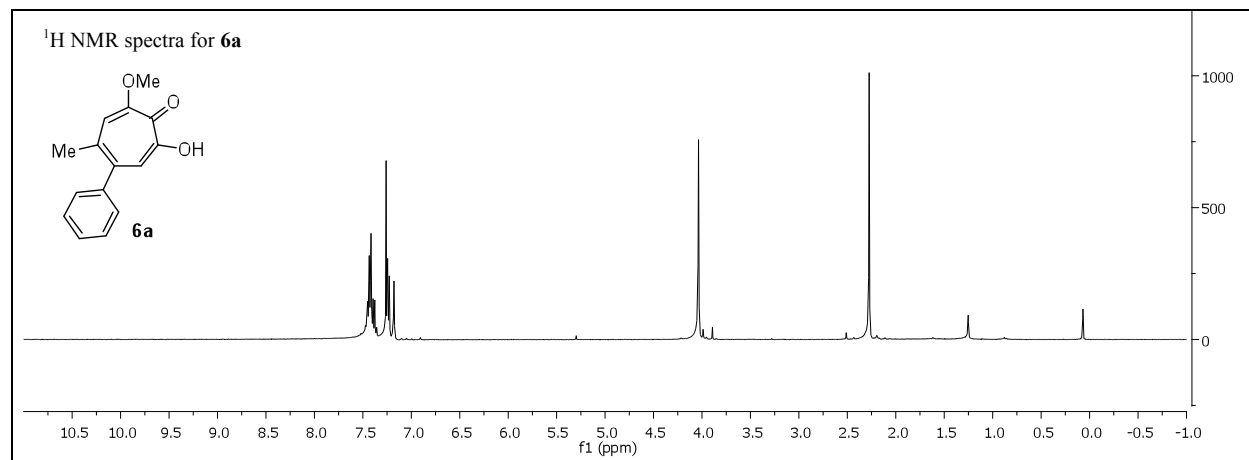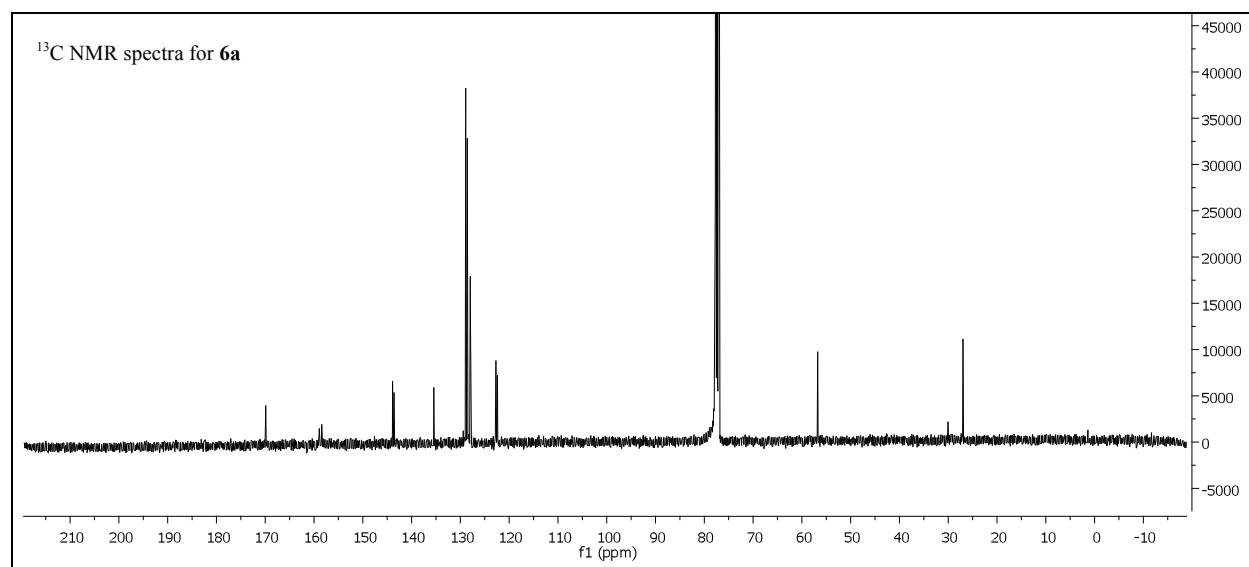

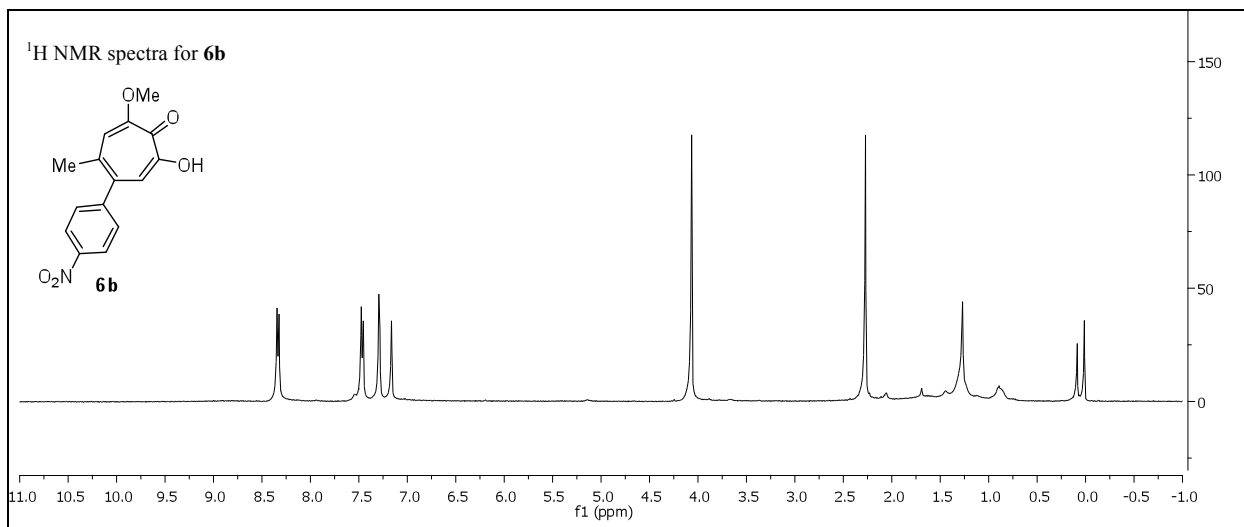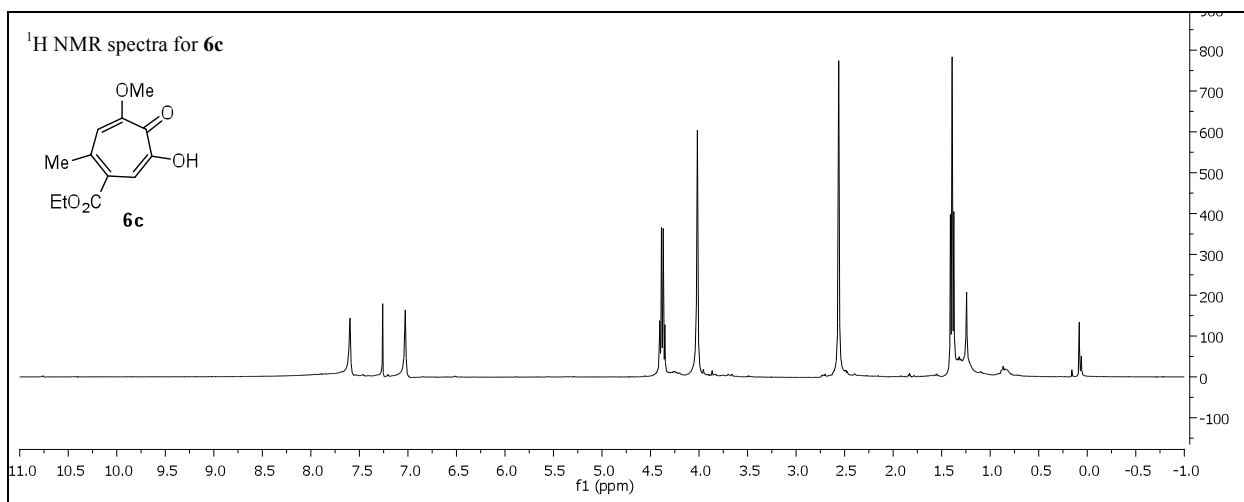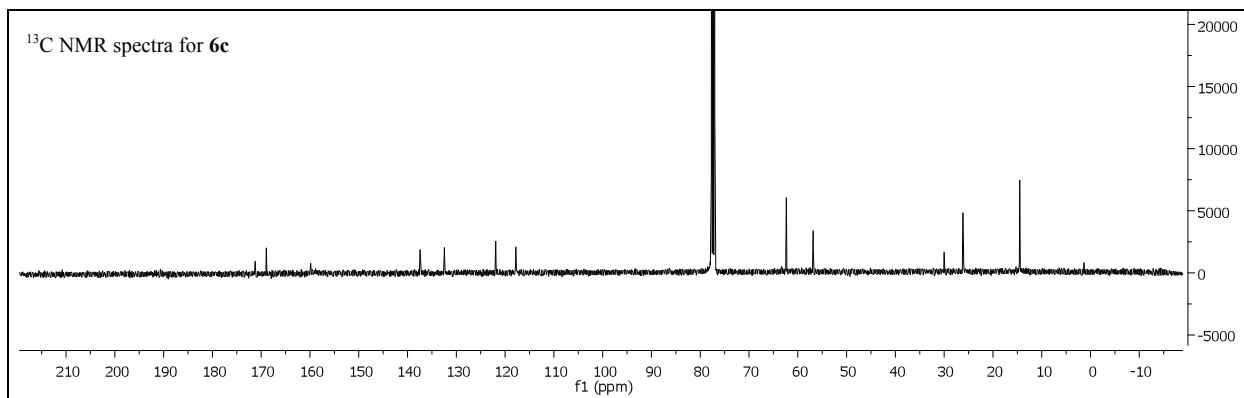

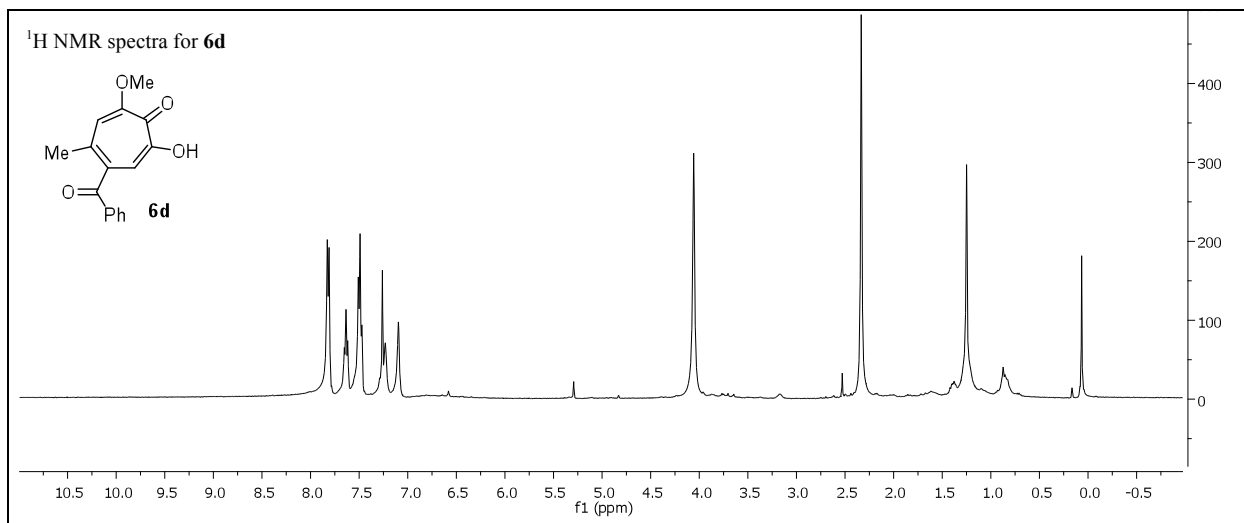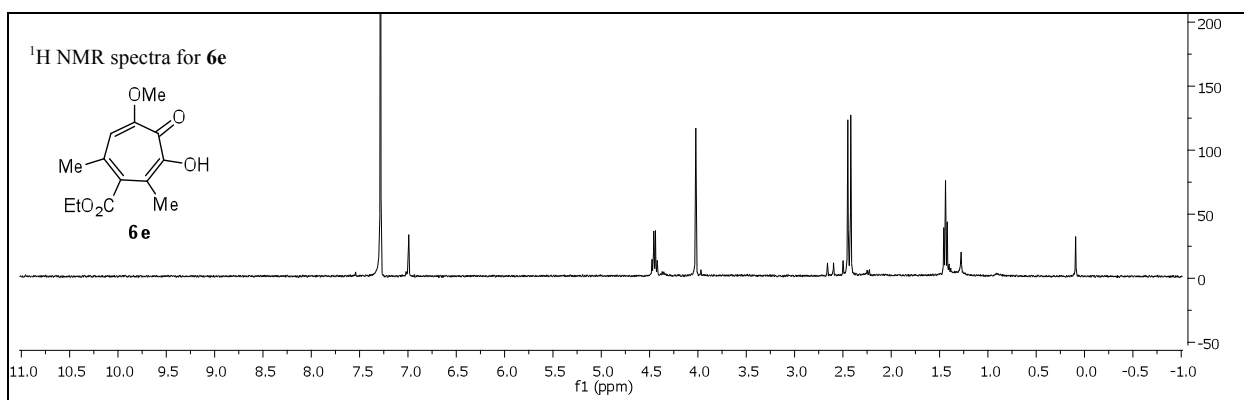

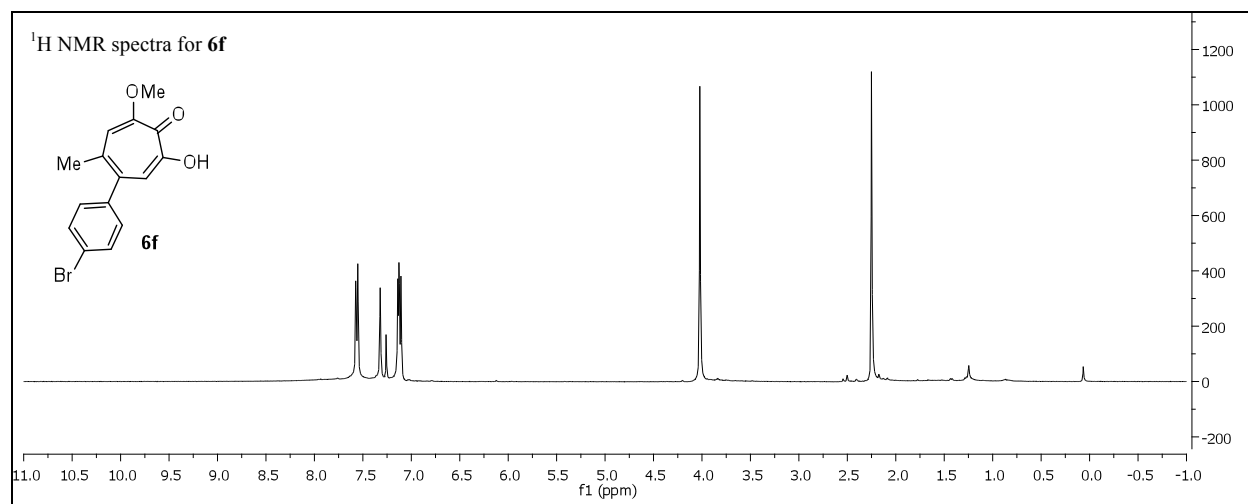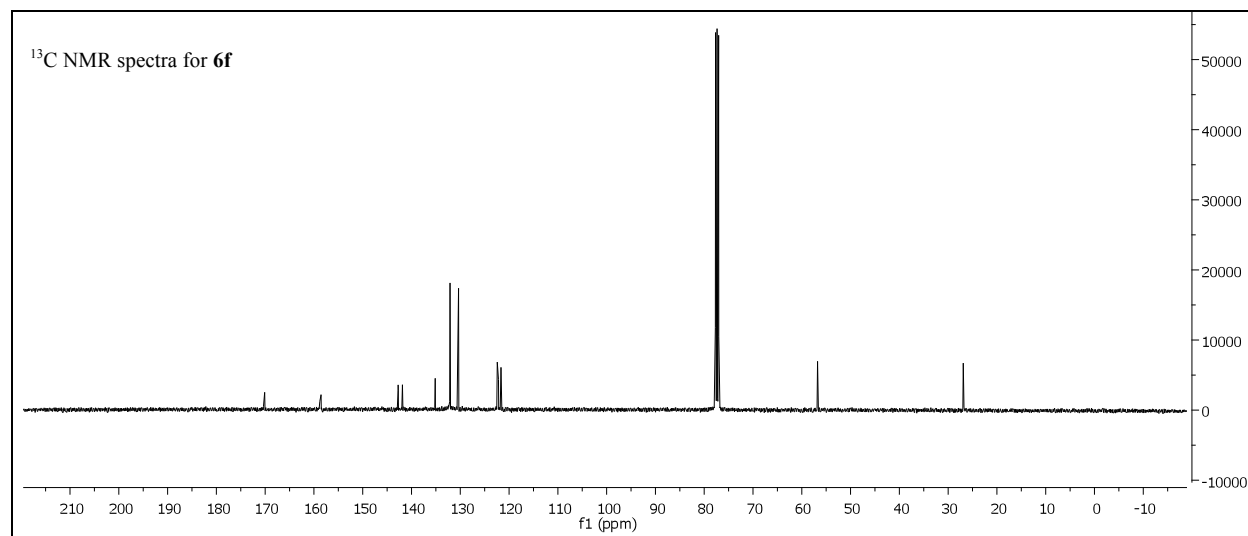



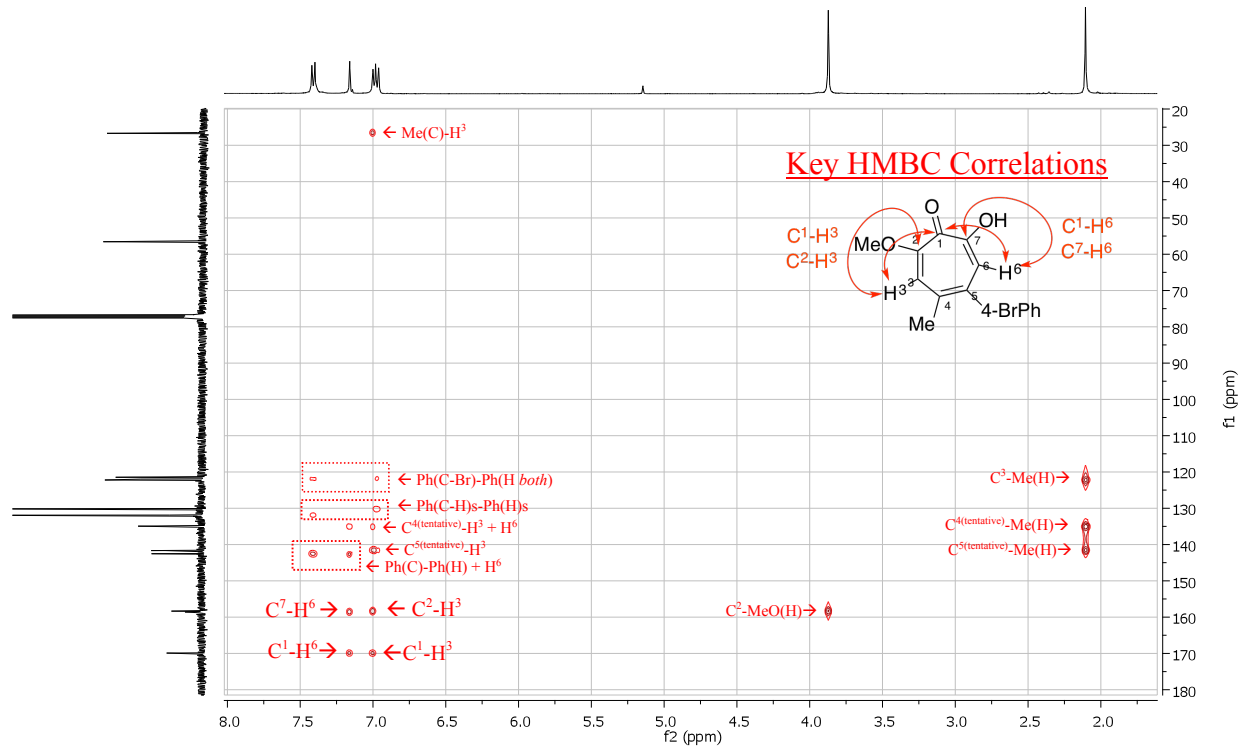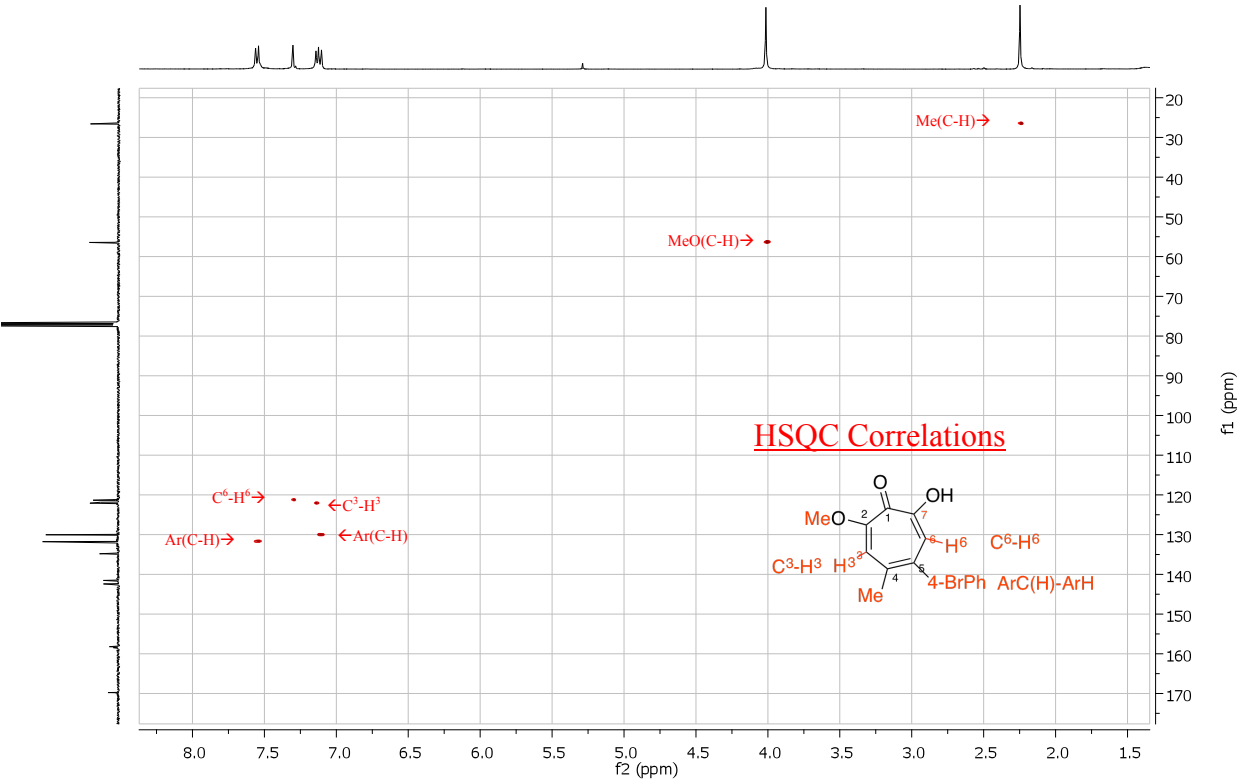

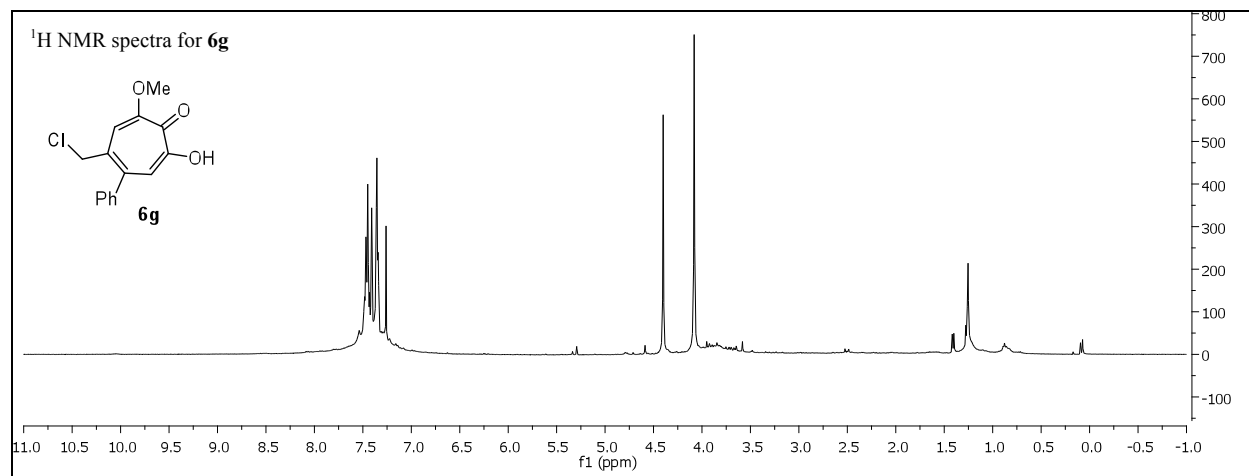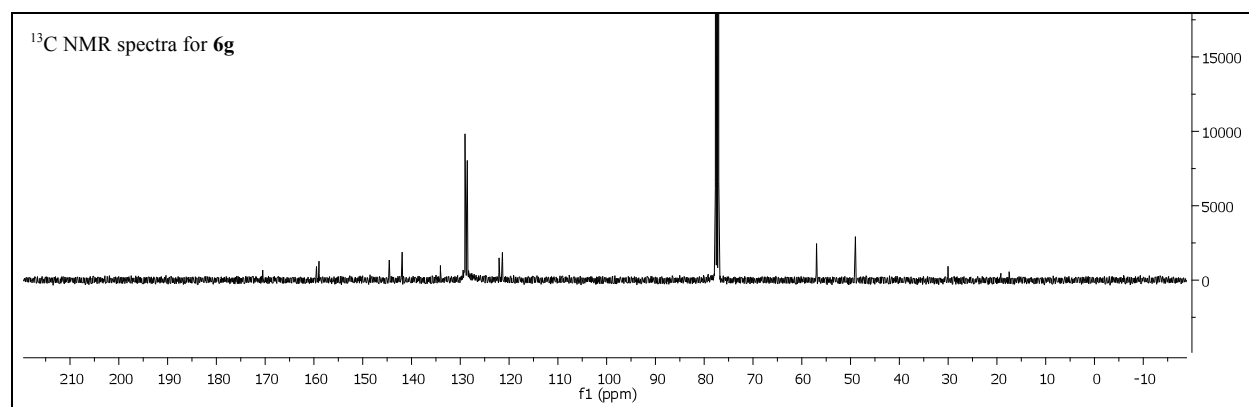

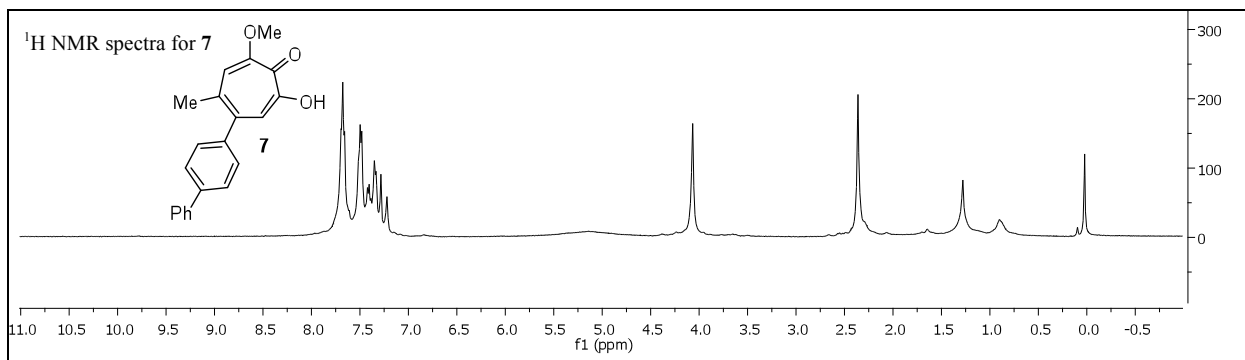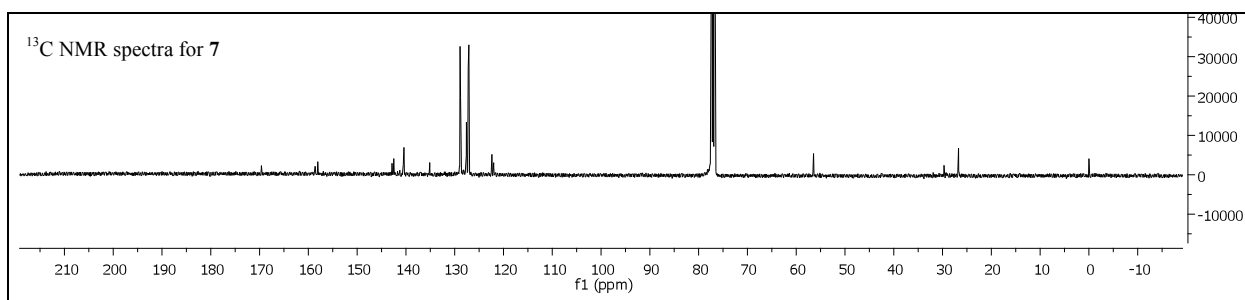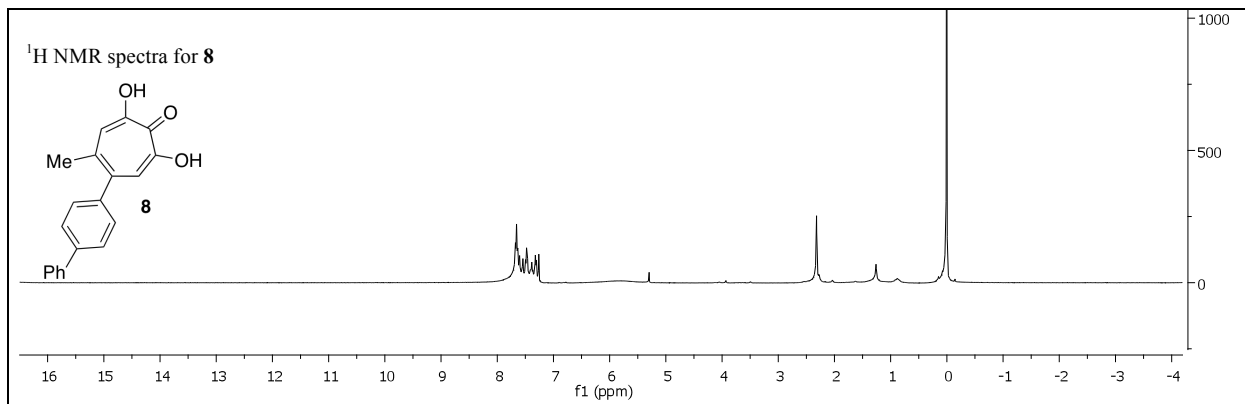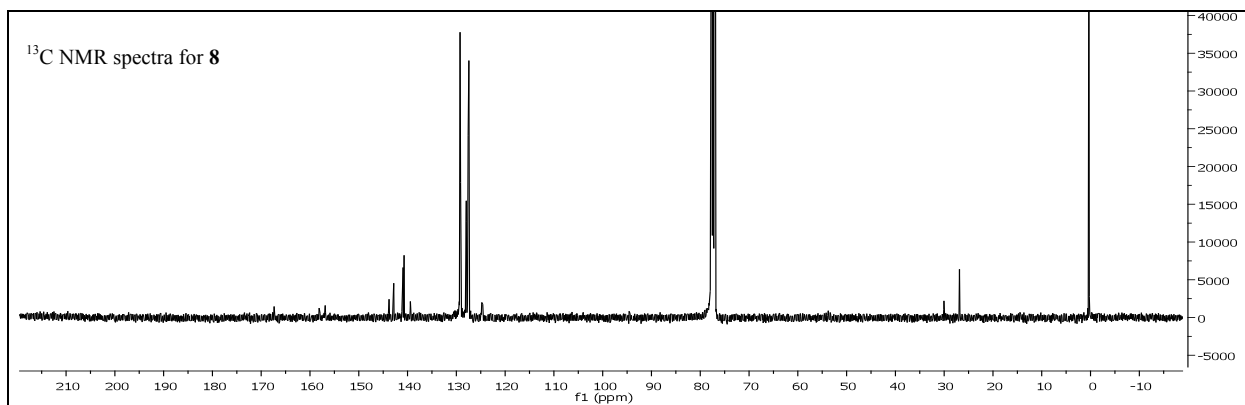

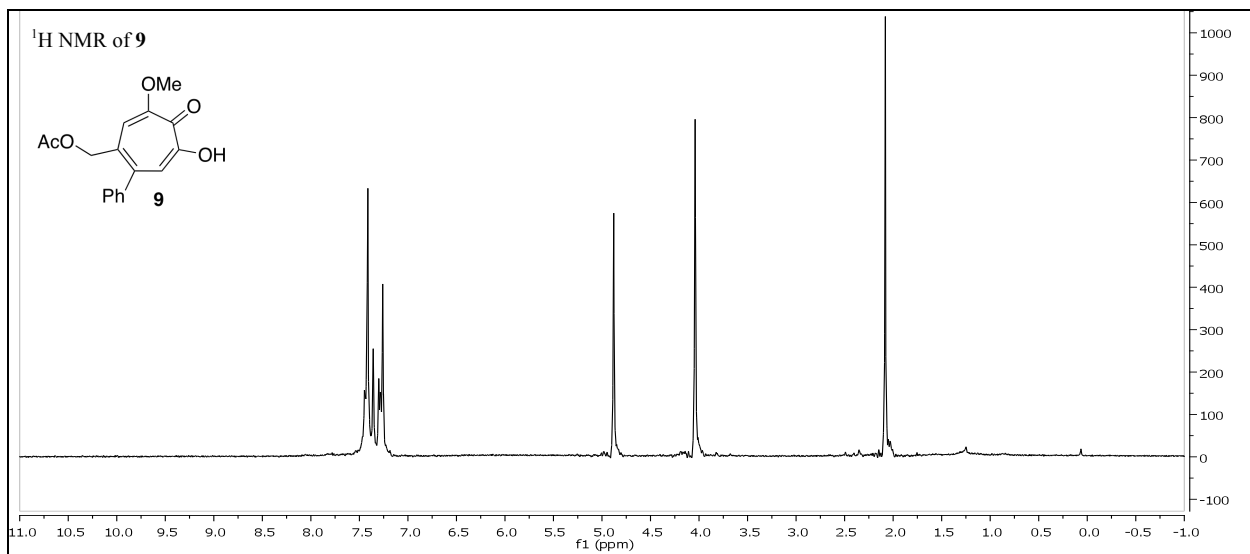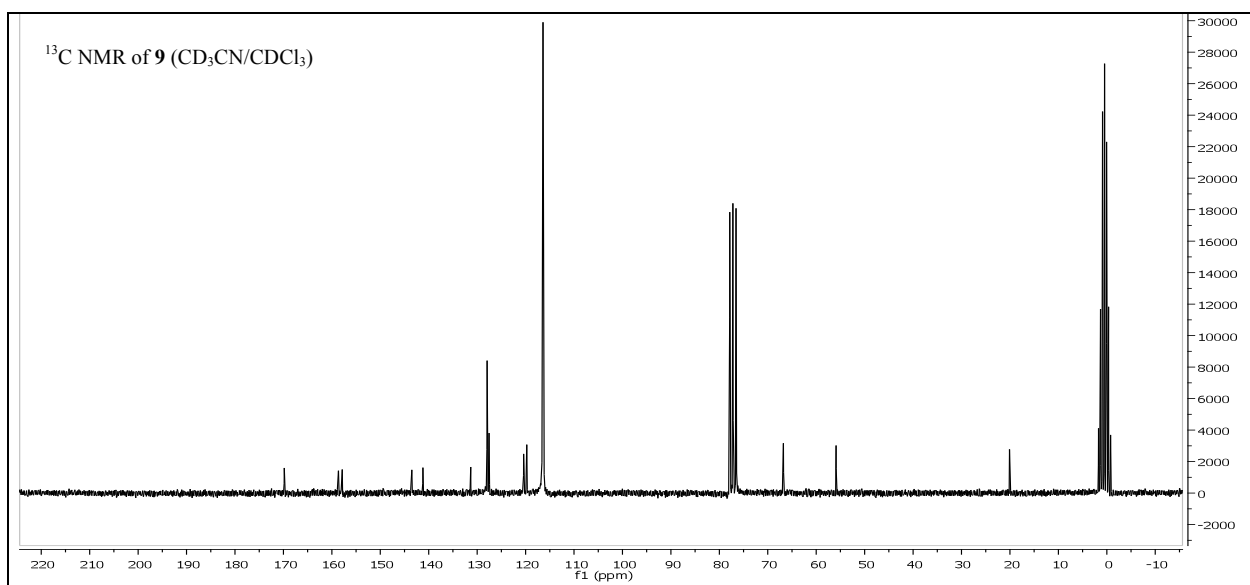

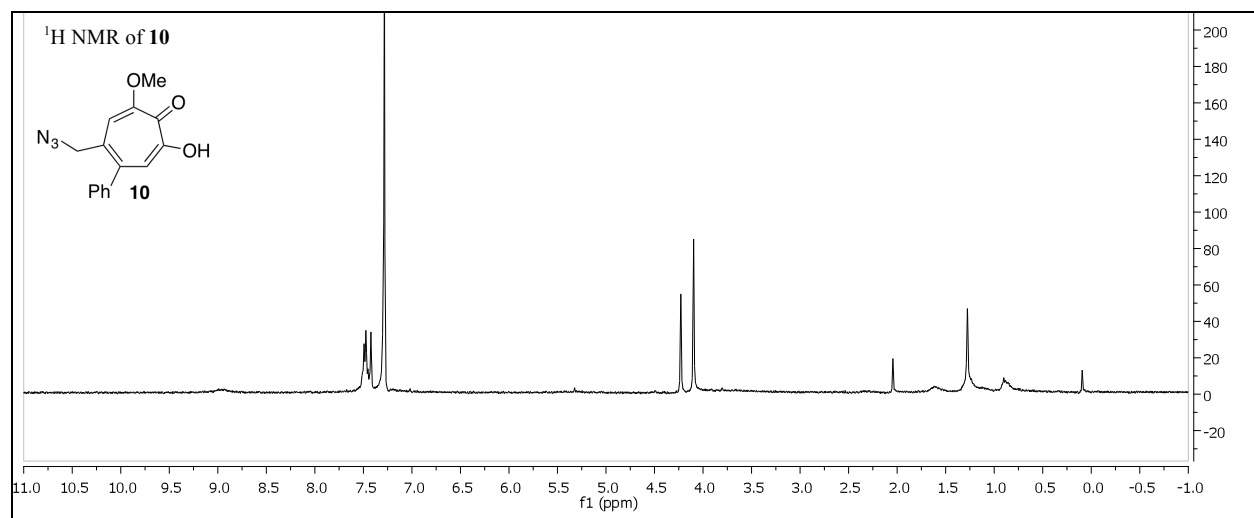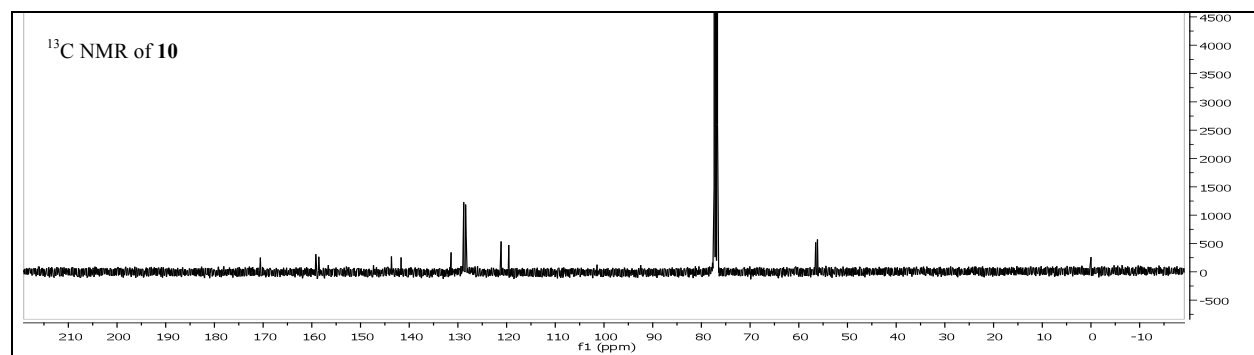

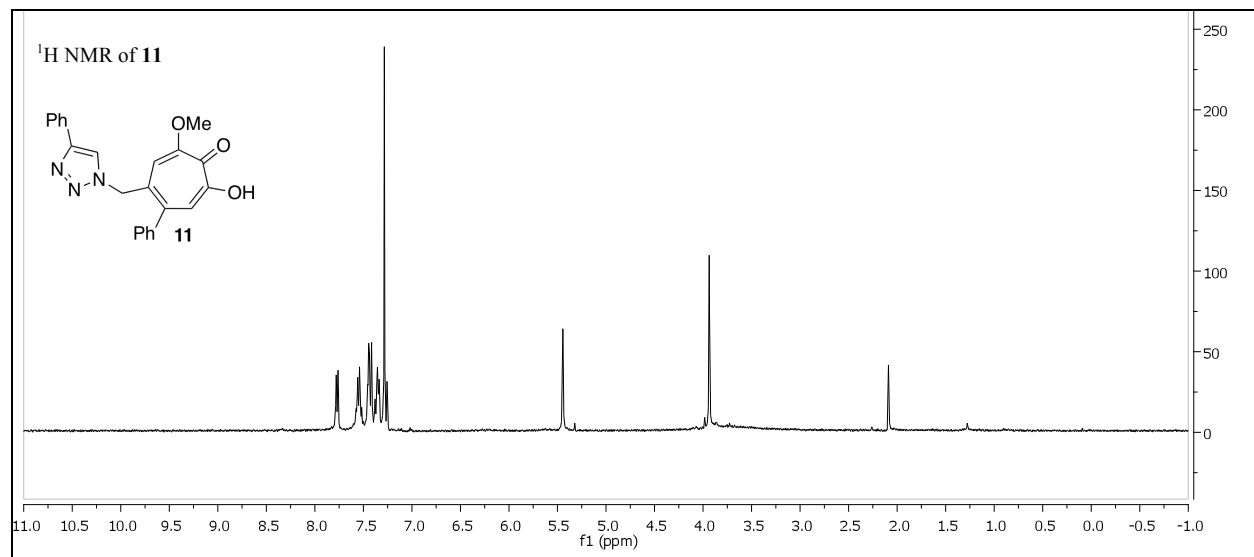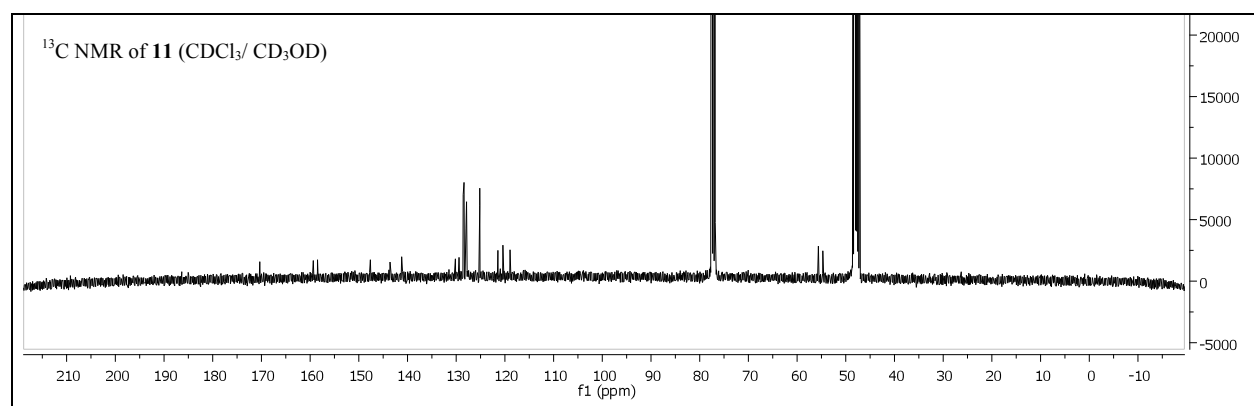

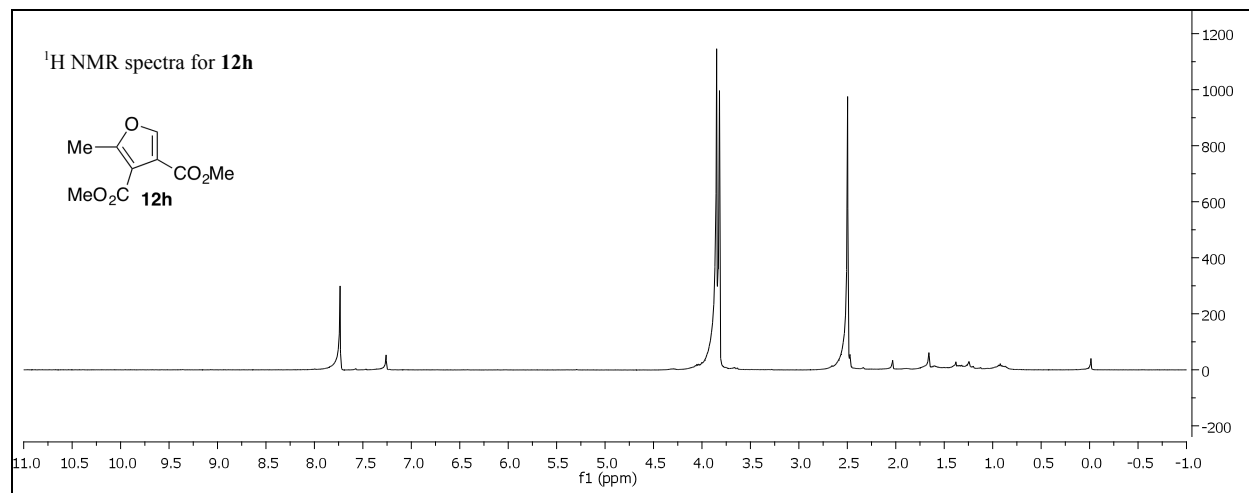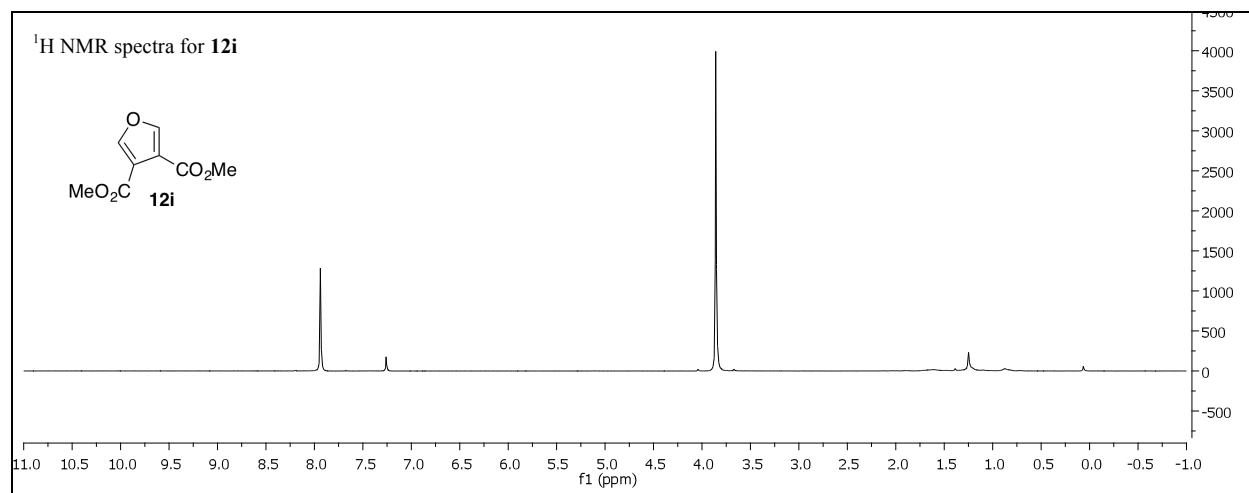

Supplement: NIHMS537971-supplement-1_si_001.pdf [file NIHMS537971-supplement-1_si_001.pdf]
